# Supplementary material
Source: Royal Society of Chemistry journal article supplement (doi:10.1039/d6tc00908e)
Supplement: d6tc00908e1.pdf [file d6tc00908e1.pdf]

## Interpretable machine learning-assisted discovery of Ba-TiO<sub>3</sub>-based ceramics with enhanced dielectric constant

Jian Liu, Hua Hao\*, Xingzhong Liu, Jiahao Tian, Bangzhi Peng, Chunze Wei,  
Jinglong Fan, Hanxing Liu\*

State Key Laboratory of Advanced Technology for Materials Synthesis and Processing, School of Material Science and Engineering, International School of Material Science and Engineering, Wuhan University of Technology, Wuhan, 430070, China

\*Corresponding authors:

E-mail: haohua@whut.edu.cn, lhxhp@whut.edu.cn

**Table S1** Detailed list of initial features

| Feature | Description                                                                 |
|---------|-----------------------------------------------------------------------------|
| AN      | Atomic number of A-site, B-site element in periodic table                   |
| AM      | Relative atomic mass of A-site, B-site element                              |
| AV      | Atomic volume of A-site, B-site element                                     |
| AD      | Atomic density of A-site, B-site element                                    |
| PE      | Period of A-site, B-site element in periodic table                          |
| Group   | Group of A-site, B-site element in periodic table                           |
| MN      | Mendeleev number of A-site, B-site element <sup>1</sup>                     |
| IR      | Shannon's ionic radius of A-site, B-site element <sup>2</sup>               |
| AR      | Atomic radius of A-site, B-site element <sup>3</sup>                        |
| VR      | van der Waals radius of A-site, B-site element <sup>4</sup>                 |
| CR      | Covalent radius of A-site, B-site element <sup>5</sup>                      |
| PR      | Pseudopotential core radius of A-site, B-site element <sup>6</sup>          |
| BDP     | Ideal A–O, B–O bond distance <sup>7</sup>                                   |
| DC      | Core electron distance (Schubert) of A-site, B-site element <sup>8</sup>    |
| DV      | Valence electron distance (Schubert) of A-site, B-site element <sup>8</sup> |
| EFF_C   | Effective nuclear charge (Clementi) of A-site, B-site element <sup>8</sup>  |

|       |                                                                                       |
|-------|---------------------------------------------------------------------------------------|
| EFF_S | Effective nuclear charge (Slater) of A-site, B-site element <sup>9</sup>              |
| DP    | Static average electric dipole polarizability of A-site, B-site element <sup>10</sup> |
| EP    | Empirical electronic polarizability of A-site, B-site element <sup>11</sup>           |
| z_ir  | Ratio of nominal charge to Shannon's ionic radius of A-site, B-site element           |
| EA    | Electron affinity of A-site, B-site element <sup>8</sup>                              |
| EI_F  | First ionization energy of A-site, B-site element <sup>8</sup>                        |
| EI_S  | Second ionization energy of A-site, B-site element <sup>8</sup>                       |
| EN_P  | Electronegativity (Pauling scale) of A-site, B-site element <sup>8</sup>              |
| EN_B  | Electronegativity (Martynov–Batsanov) of A-site, B-site element <sup>8</sup>          |
| EN_T  | Electronegativity (Thermochemical) of A-site, B-site element <sup>12</sup>            |
| NUM_S | Number of electrons in the s orbital of A-site, B-site element                        |
| NUM_P | Number of electrons in the p orbital of A-site, B-site element                        |
| NUM_D | Number of electrons in the d orbital of A-site, B-site element                        |
| NUM_F | Number of electrons in the f orbital of A-site, B-site element                        |
| t     | Tolerance factor calculated by Shannon's ionic radius                                 |

**Table S2** Comparison of 10-fold cross-validation  $R^2$  over 100 repetitions for the top four performing algorithmic models

| Algorithm | Maximum | Average |
|-----------|---------|---------|
| ETR       | 0.890   | 0.875   |
| GBR       | 0.864   | 0.850   |
| LGBM      | 0.863   | 0.848   |
| XGB       | 0.851   | 0.834   |

**Table S3** Comparison of mean  $R^2$  values from 100 times of 10-fold cross-validation across feature subsets of various dimensions

| Feature subset dimension | 61    | 26    | 11    | 6     |
|--------------------------|-------|-------|-------|-------|
| Mean $R^2$               | 0.875 | 0.877 | 0.873 | 0.874 |

**Table S4** The chemical elements occupying the A-site and B-site

| A-site | Ba | Ca | La | Sr | Dy |    |    |   |    |    |    |   |    |    |
|--------|----|----|----|----|----|----|----|---|----|----|----|---|----|----|
| B-site | Ti | Mg | Nb | Zr | Zn | Sn | Ta | Y | Ni | Fe | Hf | W | Yb | Co |

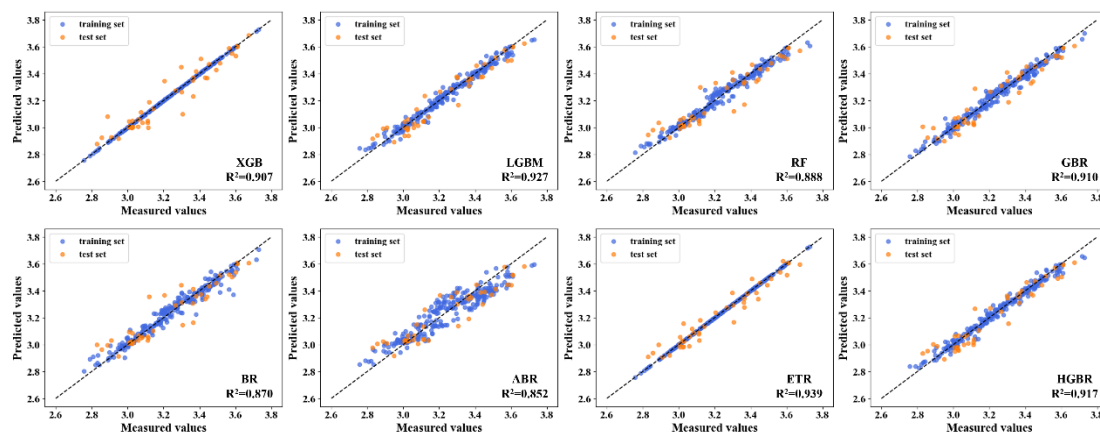

**Fig. S1** Comparison of predicted and measured values for dielectric constant.

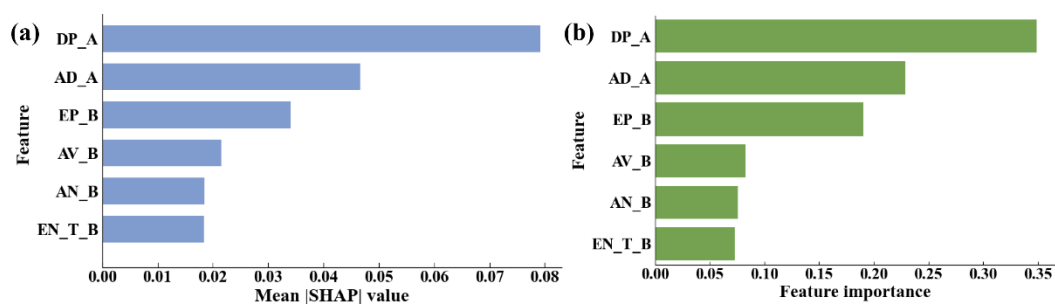

**Fig. S2** Feature importance rankings of the optimal feature subset obtained by (a) SHAP analysis and (b) ETR model.

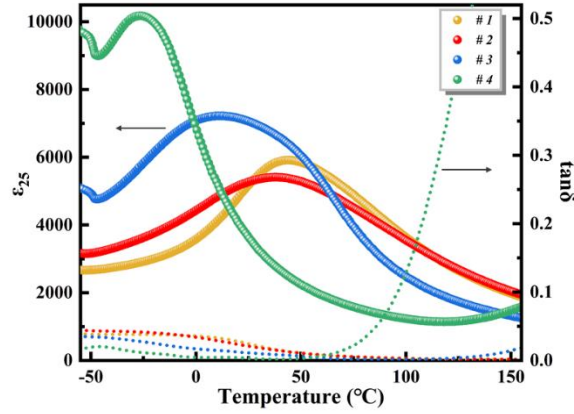

**Fig. S3** Dielectric constant and dielectric loss as a function of temperature at 1 kHz for four newly synthesized compositions

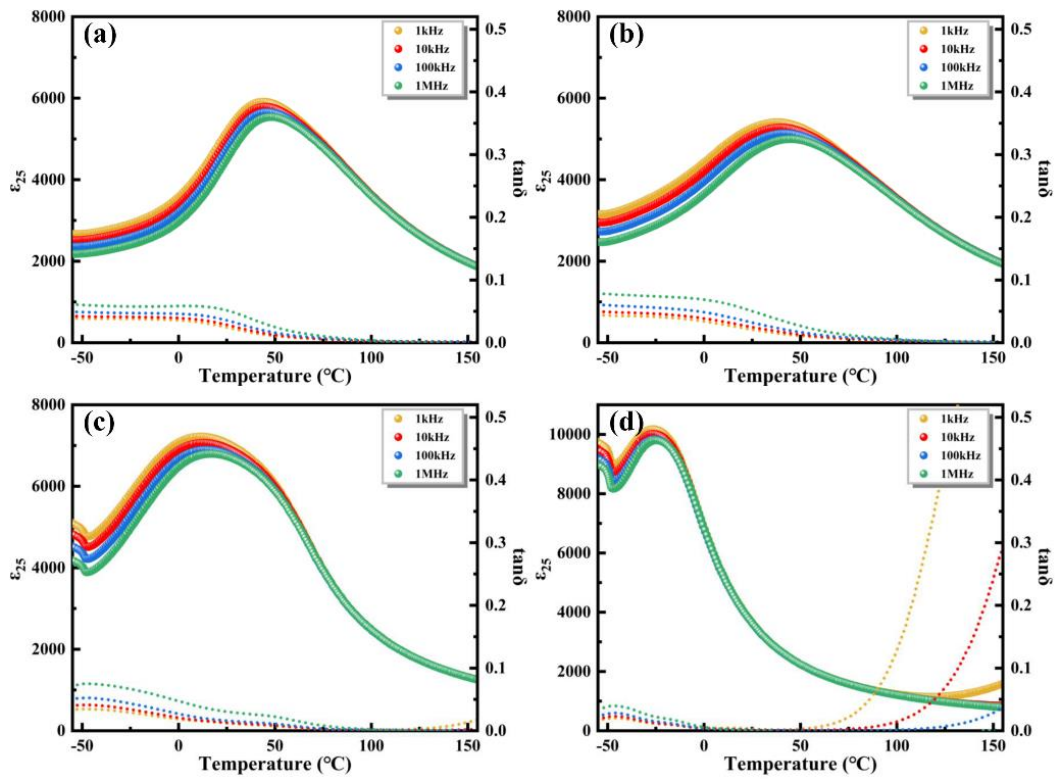

**Fig. S4** Temperature dependence of dielectric properties at various measurement frequencies for the four newly synthesized compositions (a) #1; (b) #2; (c) #3; (d) #4.

### Experimental details

The four newly synthesized compounds were prepared by solid-state reaction method. First, the raw materials were weighed according to the stoichiometric ratios using an electronic balance and then transferred into the ball mill jar. An appropriate amount of anhydrous ethanol and zirconia balls were added, and the mixture was ball-

milled for 4 hours. The resulting slurry was dried in an oven, and the dried powder was ground and then pre-calcined at 1150 °C. After pre-calcination, the powder was subjected to a second ball-milling, and followed by drying process. Subsequently, 5 wt.% PVA was added as a binder to the dried powder for granulation, and the granulated powder was then uniaxially dry-pressed into green pellets ( $\approx 12$  mm in diameter,  $\approx 1$  mm in thickness). The green pellets were subjected to binder removal in a muffle furnace at 600 °C for 2 h, followed by sintering at 1320~1400 °C. Prior to electrical measurements, both sides of the sintered samples were polished and coated with silver paste. After a subsequent calcination step, silver electrodes were formed on the surfaces, thereby constructing a capacitor structure for further testing. The dielectric properties were measured over a frequency range of  $10^3\sim 10^6$  Hz.

## References

- 1 P. Villars, K. Cenzual, J. Daams, Y. Chen and S. Iwata, *J. Alloys Compd.*, 2004, **367**, 167–175.
- 2 R.D.Shannon, *Acta Cryst*, 1976, **32**, 751–767.
- 3 J.C. Slater, *J. Chem. Phys.*, 1964, **41**, 3199–3204.
- 4 S. S. Batsanov, *Inorganic Materials*, 2001, **37**, 871–885.
- 5 B. Cordero, V. Gómez, A. E. Platero-Prats, M. Revés, J. Echeverría, E. Cremades, F. Barragán and S. Alvarez, *Dalton Transactions*, 2008, 2832–2838.
- 6 A. Zunger, *Phys. Rev. B*, 1980, **22**, 5839–5872.
- 7 N. E. Brese and M. O’keeffe, *Acta Cryst*, 1991, **47**, 192–197.
- 8 <https://www.webelements.com>.
- 9 J. C. Slater, *physical review*, 1930, **36**, 57–64.
- 10 D.R. Lide, H. William M, CRC handbook of chemistry and physics: A ready-reference book of chemical and physical data, CRC, Boca Raton, FL, USA, 2004
- 11 R. D. Shannon and R. X. Fischer, *Phys. Rev. B*, 2006, **73**, 235111.
- 12 C. Tantardini and A. R. Oganov, *Nat. Commun.*, 2021, **12**, 2087.
